# Supplementary material for: Decreased Expression of Estrogen Receptors Is Associated with Tumorigenesis in Papillary Thyroid Carcinoma
Source: MDPI journal article supplement (doi:10.3390/ijms23031015), 2022-01-18
Supplement: s1 [file s1]

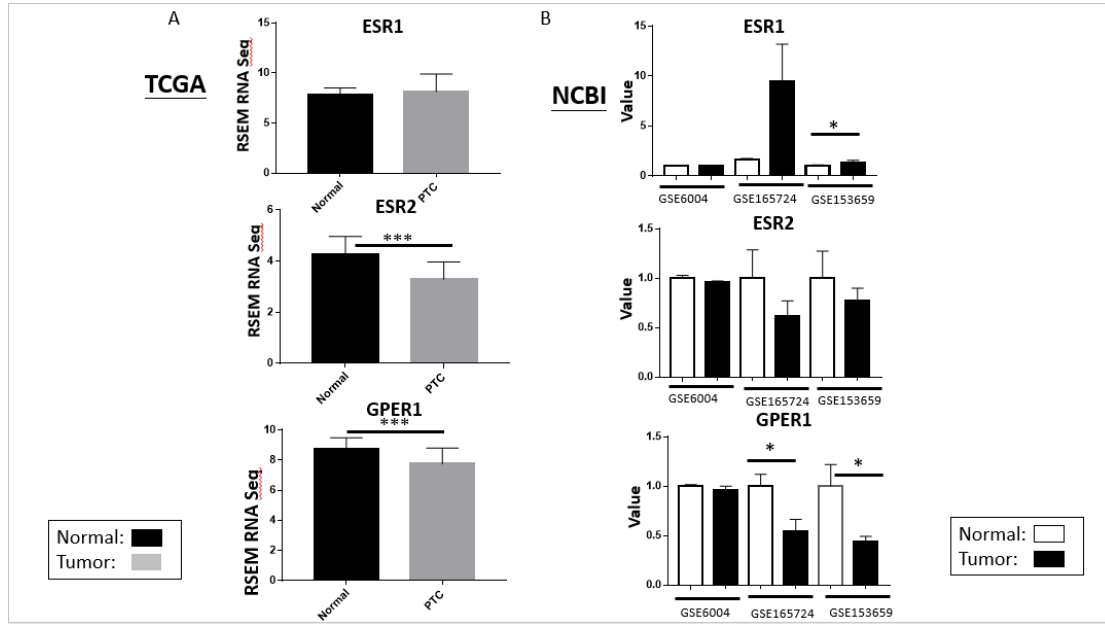

**Figure S1.** Low ER $\beta$  and *GPER1* mRNA expression levels in PTC specimens from open access datasets. Analysis of ER $\alpha$ , ER $\beta$ , and *GPER1* mRNA expression levels in (A) TCGA datasets and (B) NCBI datasets. ER mRNA expression levels was presented as RNA-seq RSEM ( $\log_2(\text{norm count} + 1)$ ) in TCGA datasets. \*\*\*  $p < 0.001$  \*  $p < 0.05$  compared with normal thyroid tissues.

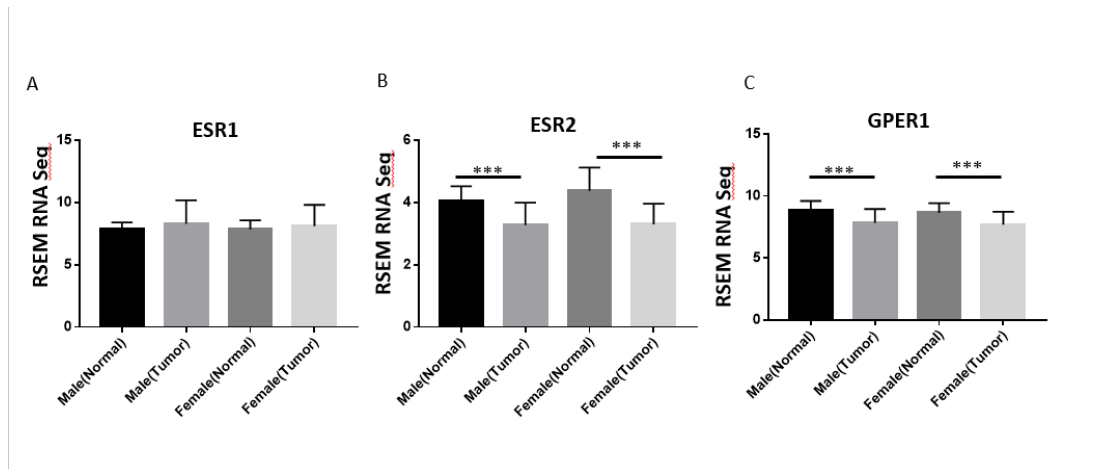

**Figure S2.** Low mRNA expression levels of ER $\beta$  and *GPER1* in PTC specimens from both male and female patients. Expression levels of (A) ER $\alpha$ , (B) ER $\beta$ , and (C) *GPER1*. The mRNA expression levels of ERs was labeled as RNA-seq RSEM ( $\log_2(\text{norm count} + 1)$ ) in TCGA datasets. \*  $p < 0.00$  compared with normal thyroid tissues. \*\*\*  $p < 0.001$  compared with normal thyroid tissues.
